# Supplementary material for: Reinforcement of biodegradable poly(3-hydroxybutyrate-co-3-hydroxyvalerate) with cellulose nanocrystal/silver nanohybrids as bifunctional nanofillers
Source: Royal Society of Chemistry journal article supplement (doi:10.1039/c4tb01372g), 2014-10-03
Supplement: c4tb01372g1.pdf [file c4tb01372g1.pdf]

## **Reinforcement of biodegradable poly(3-hydroxybutyrate-co-3-hydroxyvalerate) with cellulose nanocrystal/silver nano hybrids as bifunctional nanofillers**

Houyong Yu<sup>a\*,b</sup>, Bin Sun<sup>a</sup>, Dongzi Zhang<sup>a</sup>, Guoyin Chen<sup>a</sup>, Xingyuan Yang<sup>a</sup>, Juming Yao<sup>a,b\*</sup>

*<sup>a</sup> The Key Laboratory of Advanced Textile Materials and Manufacturing Technology of Ministry of Education, College of Materials and Textile, Zhejiang Sci-Tech University, Hangzhou 310018, China*

*<sup>b</sup> National Engineering Lab for Textile Fiber Materials & Processing Technology, Zhejiang Sci-Tech University, Hangzhou 310018, China*

### **Supporting Information:**

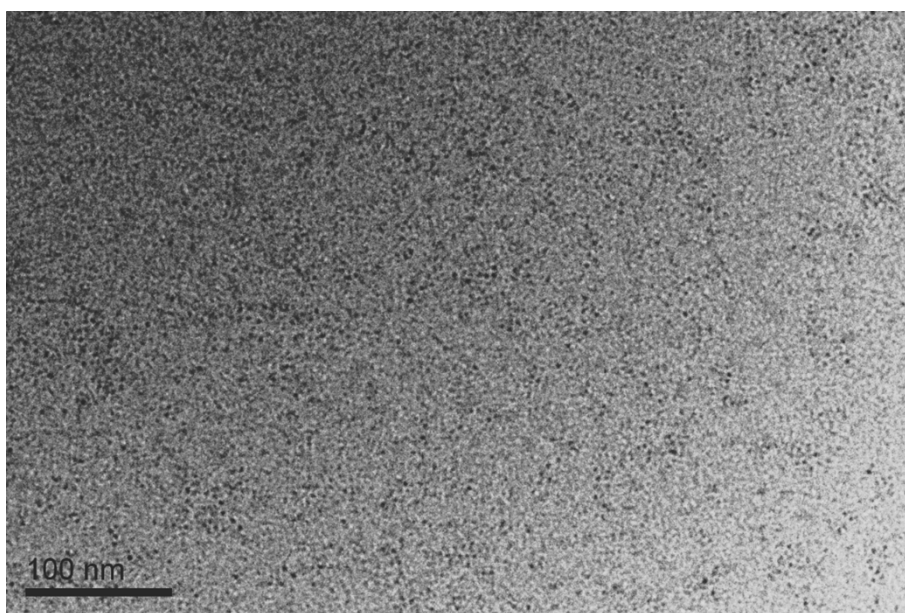

Figure S1. TEM images of the nanocomposites with 10 wt.% CNC-Ag.

---

\*Corresponding author. Tel.: 86 571 86843618; fax: 86 571 86843619.

E-mail addresses: phdyu@zstu.edu.cn (Hou-Yong Yu); yaoj@zstu.edu.cn (Ju-Ming Yao)

**Table S1** The melting enthalpies ( $\Delta H_m$ ) and crystallinity obtained from DSC curves ( $X_{DSC}$ ) for neat PHBV and the nanocomposites with various CNC-Ag concentrations.

| Sample             | PHBV     | 1%       | 3%       | 5%       | 10%      | 15%      |
|--------------------|----------|----------|----------|----------|----------|----------|
| $\Delta H_m$ (J/g) | 74.7±0.9 | 73.8±1.3 | 75.7±0.8 | 74.9±0.6 | 70.9±1.1 | 62.3±0.9 |
| $X_{DSC}$ (%)      | 50.9±0.6 | 50.8±0.8 | 53.2±0.5 | 53.7±0.4 | 53.7±0.8 | 50.0±0.7 |

<sup>a</sup> The crystallinity ( $X_{DSC}$ ) =  $\left[ \frac{\Delta H_m}{(1 - \phi_{CNC-Ag}) \Delta H_{100}} \right] \times 100\%$ , where  $X_{DSC}$  is the crystallinity,

$\phi_{CNC-Ag}$  is the weight fraction of CNC-Ag. The  $\Delta H_m$  is the measured melting enthalpies and  $\Delta H_{100}$  is chosen as 146.6 J/g for melting enthalpy of 100% crystalline PHBV due to the low HV content of PHBV in our study<sup>1,2</sup>.

(1) Shan, G. F.; Gong, X.; Chen, W. P.; Chen, L., Zhu, M. F. Effect of multi-walled carbon nanotubes on crystallization behavior of poly (3-hydroxybutyrate-co-3-hydroxyvalerate). *Colloid. Polym. Sci.* **2011**, 289, 1005–1014.

(2) Carli, L.N.; Crespo, J.S.; Mauler, R.S. PHBV nanocomposites based on organomodified montmorillonite and halloysite: The effect of clay type on the morphology and thermal and mechanical properties. *Composites Part A* **2011**, 42, 1601–1608.
